# Supplementary material for: Deficient Purposeful Use of Forepaws in Female Mice Modelling Rett Syndrome
Source: Neural Plast. 2015 Jun 22;2015:326184. doi: 10.1155/2015/326184 (PMC4491574; doi:10.1155/2015/326184)
Supplement: Supplementary file 1 — Supplementary Video 1: Illustrative portion of one experimental session of the Morag test showing the performance of a wild-type mouse. Supplementary Video 2: Illustrative portion of one experimental session of the Morag test showing the performance of a RTT mouse. [file 326184.f1.zip]

Archive with 6 entries (4 files):
- Supplementary Videos/
- Supplementary Videos/Supplementary Video 1.mov
- Supplementary Videos/Supplementary Video 2- Revised.mov
- Videos/
- Videos/Video S1 Morag test wt mouse.mov
- Videos/Video S2 Morag test RTT mouse.mov
